# Supplementary material for: Influences of a Luck Game on Offers in Ultimatum and Dictator Games: Is There a Mediation of Emotions?
Source: PubMed Central journal article supplement (PMC7008780; doi:10.3389/fpsyg.2020.00013), 2020-02-03

## Supplementary material

Table 1 – Multivariate and univariate tests of MANCOVA performed on delta ( $\Delta$ ) emotions (the post-value less the pre-value).

| <b>Multivariate tests:</b> | <b>Pillai's Trace</b>     | <b>df</b> | <b>F</b> | <b>p</b> | <b><math>\eta_p^2</math></b> |
|----------------------------|---------------------------|-----------|----------|----------|------------------------------|
| Intercept                  | .126                      | 6,288     | 6.940    | .000     | .126                         |
| Outcome                    | .217                      | 12,578    | 5.849    | .000     | .108                         |
| Game                       | .032                      | 6,288     | 1.569    | .156     | .032                         |
| Outcome x Game             | .032                      | 12,578    | 0.772    | .680     | .016                         |
| Gender                     | .068                      | 6,288     | 3.508    | .002     | .068                         |
| <b>Univariate tests :</b>  | <b>Dependent Variable</b> | <b>df</b> | <b>F</b> | <b>p</b> | <b><math>\eta_p^2</math></b> |
| Outcome                    | $\Delta$ Disappointment   | 2         | 4.419    | .013     | .029                         |
|                            | $\Delta$ Feeling Lucky    | 2         | 13.601   | .000     | .085                         |
|                            | $\Delta$ Irritation       | 2         | 1.962    | .142     | .013                         |
|                            | $\Delta$ Joy              | 2         | 16.374   | .000     | .101                         |
|                            | $\Delta$ Sadness          | 2         | .124     | .883     | .001                         |
|                            | $\Delta$ Satisfaction     | 2         | 13.761   | .000     | .086                         |
| Game                       | $\Delta$ Disappointment   | 1         | .358     | .550     | .001                         |
|                            | $\Delta$ Feeling Lucky    | 1         | 3.241    | .073     | .011                         |
|                            | $\Delta$ Irritation       | 1         | .127     | .721     | .000                         |
|                            | $\Delta$ Joy              | 1         | .025     | .874     | .000                         |
|                            | $\Delta$ Sadness          | 1         | 2.232    | .136     | .008                         |
|                            | $\Delta$ Satisfaction     | 1         | 1.833    | .177     | .006                         |
| Outcome x Game             | $\Delta$ Disappointment   | 2         | .675     | .510     | .005                         |
|                            | $\Delta$ Feeling Lucky    | 2         | 1.139    | .321     | .008                         |
|                            | $\Delta$ Irritation       | 2         | .245     | .783     | .002                         |
|                            | $\Delta$ Joy              | 2         | .430     | .651     | .003                         |
|                            | $\Delta$ Sadness          | 2         | .628     | .534     | .004                         |
|                            | $\Delta$ Satisfaction     | 2         | 1.373    | .255     | .009                         |
| Gender                     | $\Delta$ Disappointment   | 1         | .166     | .684     | .001                         |
|                            | $\Delta$ Feeling Lucky    | 1         | 7.222    | .008     | .024                         |
|                            | $\Delta$ Irritation       | 1         | .423     | .516     | .001                         |
|                            | $\Delta$ Joy              | 1         | 8.977    | .003     | .030                         |
|                            | $\Delta$ Sadness          | 1         | .072     | .789     | .000                         |
|                            | $\Delta$ Satisfaction     | 1         | 10.943   | .001     | .036                         |
| df error                   |                           | 293       |          |          |                              |

Table 2 – Significant results of the moderated mediation analysis (Model 5 of Process macro) testing the effects of Outcome (IV), Delta emotions (mediators), Game (moderator) and gender (covariate) on the offer.

| <i>Model summary</i> | <i>R-sq</i> | <i>F</i> | <i>df</i> | <i>p</i> |  |
|----------------------|-------------|----------|-----------|----------|--|
|                      | .111        | 3.598    | 10,289    | .000     |  |

  

| <i>Model</i>            | <i>B</i> | <i>t</i> | <i>p</i> | <i>CI</i>        |
|-------------------------|----------|----------|----------|------------------|
| Constant                | 5.360    | 9.882    | .000     | [4.293; 6.428]   |
| Positive outcome        | 1.977    | 2.775    | .006     | [.575; 3.379]    |
| Negative outcome        | -.235    | -.327    | .744     | [-1.650; 1.181]  |
| Δ Disappointment        | -.056    | -.568    | .570     | [-.249; .137]    |
| Δ Feeling Lucky         | -.100    | -1.005   | .316     | [-.297; .096]    |
| Δ Joy                   | -.282    | -1.939   | .054     | [-.569; .004]    |
| Δ Satisfaction          | .126     | 1.110    | .268     | [-.097; .349]    |
| Game                    | .795     | 1.125    | .262     | [-.596; 2.186]   |
| Positive outcome x Game | -3.455   | -3.453   | .001     | [-5.425; -1.486] |
| Negative outcome x Game | 1.665    | 1.656    | .099     | [-.314; 3.643]   |
| Gender                  | -.286    | -.674    | .501     | [-1.119; .548]   |

  

**Conditional effect of the focal predictor at values of the moderator:**

| <i>Outcome</i> | <i>Game</i> | <i>Effect</i> | <i>t</i> | <i>p</i> | <i>CI</i>       |
|----------------|-------------|---------------|----------|----------|-----------------|
| Positive       | DG          | 1.977         | 2.775    | .006     | [.574; 3.379]   |
| Negative       | DG          | -.235         | -.327    | .744     | [-1.650; 1.180] |
| Positive       | UG          | -1.479        | -2.035   | .043     | [-2.908; -.049] |
| Negative       | UG          | 1.430         | 1.993    | .047     | [.018; 2.842]   |

  

**There are no significant indirect effects**

Figure 1 – Diagram of the Model 5 – Moderated mediation analysis

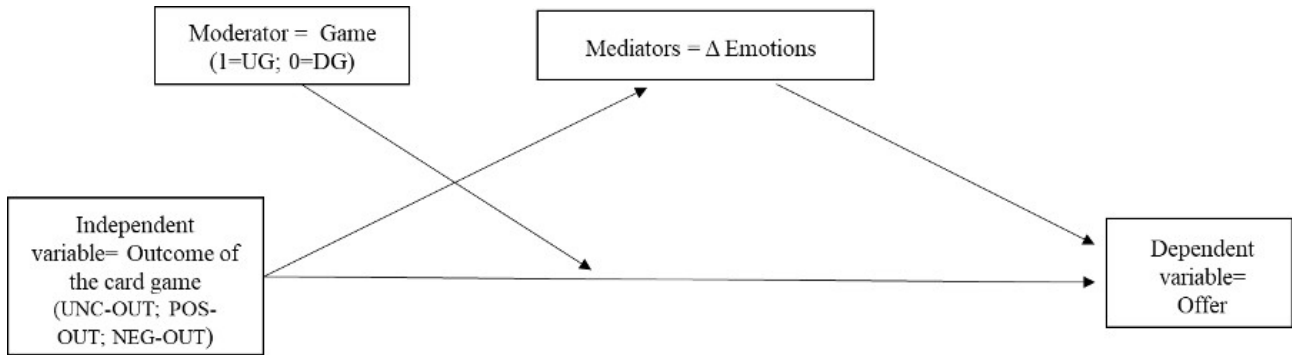

Supplement: Data_Sheet_1.pdf [file Data_Sheet_1.pdf]
